# Supplementary material for: Recombination Rate Variation and Infrequent Sex Influence Genetic Diversity in Chlamydomonas reinhardtii
Source: PubMed Central journal article supplement (PMC7186780; doi:10.1093/gbe/evaa057), 2020-03-17
Supplement: evaa057_supplementary_data.pdf [file evaa057_supplementary_data.pdf]

## Supplementary Information

| Strain  | Collection Location/Year | Mating type |
|---------|--------------------------|-------------|
| CC-2936 | Montreal, Quebec/1993    | +           |
| CC-2937 | Montreal, Quebec/1993    | +           |
| CC-3060 | Farnham, Quebec/1995     | +           |
| CC-3064 | Farnham, Quebec/1995     | +           |
| CC-3065 | Farnham, Quebec/1995     | +           |
| CC-3068 | Farnham, Quebec/1995     | +           |
| CC-3071 | Farnham, Quebec/1995     | +           |
| CC-3076 | Montreal, Quebec/1995    | +           |
| CC-3086 | Montreal, Quebec/1995    | +           |
| CC-2935 | Montreal, Quebec/1993    | -           |
| CC-2938 | Montreal, Quebec/1993    | -           |
| CC-3059 | Farnham, Quebec/1995     | -           |
| CC-3061 | Farnham, Quebec/1995     | -           |
| CC-3062 | Farnham, Quebec/1995     | -           |
| CC-3063 | Farnham, Quebec/1995     | -           |
| CC-3073 | Farnham, Quebec/1995     | -           |
| CC-3075 | Montreal, Quebec/1995    | -           |
| CC-3079 | Montreal, Quebec/1995    | -           |
| CC-3084 | Montreal, Quebec/1995    | -           |

Table S1: Field strains of *C. reinhardtii* used in this study. All strains were obtained from the *Chlamydomonas* Resource Center ([chlamycollection.org](http://chlamycollection.org)).

Model 1: CDS versus intronic recombination

Response: Recombination rate (log10)

| Predictor                           | $\beta$ | t-value | p                     |
|-------------------------------------|---------|---------|-----------------------|
| SNP density (log10)                 | 0.727   | 108.68  | $2.2 \times 10^{-16}$ |
| annotation (in CDS: 1, intronic: 0) | 0.309   | 21.66   | $2.2 \times 10^{-16}$ |
| SNP density:annotation              | 0.058   | 5.96    | $2.39 \times 10^{-9}$ |

Table S2: Multiple regression of recombination rate by SNP density and annotation, contrasting recombination rate in coding exons versus introns.

Model 2: Long versus short intergenic tracts  
 Response: Recombination rate (log10)

| Predictor                      | $\beta$ | t-value | p                     |
|--------------------------------|---------|---------|-----------------------|
| SNP density (log10)            | 0.550   | 31.19   | $2.2 \times 10^{-16}$ |
| annotation (long: 1, short: 0) | 0.240   | 9.69    | $2.2 \times 10^{-16}$ |

Table S3: Multiple regression of recombination rate by SNP density and annotation, contrasting recombination rate in long (>2 kbp) versus short (<2 kbp) intergenic tracts. Interaction term was nonsignificant and therefore excluded from the model.

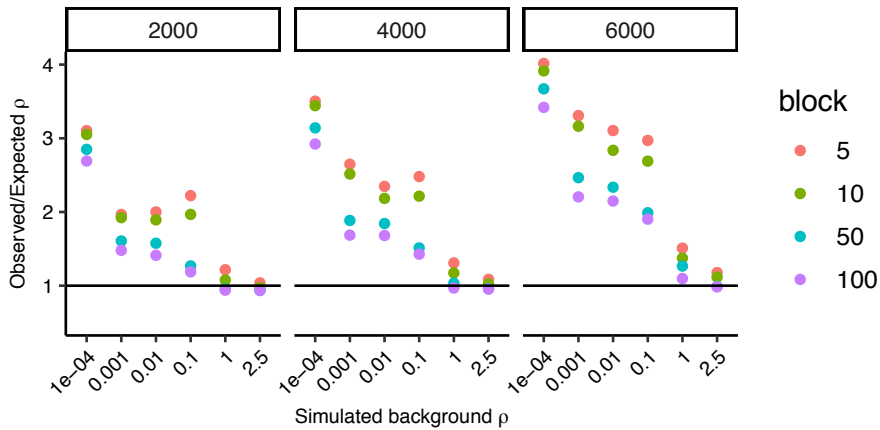

Figure S1: Observed/expected  $\rho$  across block penalties for simulated 1 Mb haplotypes generated under a range of background  $\rho$  values and varying hot-spot sizes (2 kbp - 6 kbp).

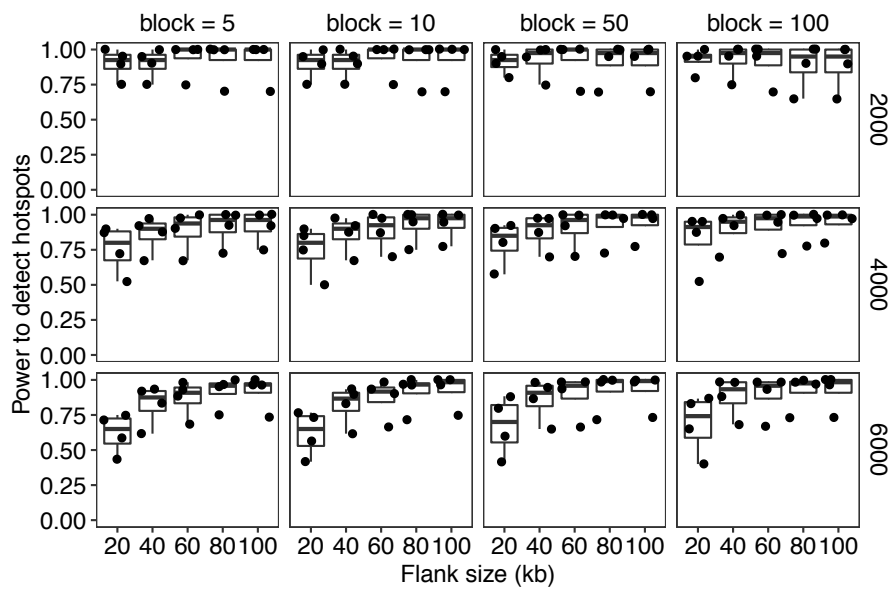

Figure S2: Power to detect hotspots under differing flank sizes and hotspot sizes around a central 2 kbp window. Hotspots were defined as 5-fold  $\rho$  elevations in a focal 2 kbp window over surrounding sequence. Power was defined as (1 - number of false negatives).

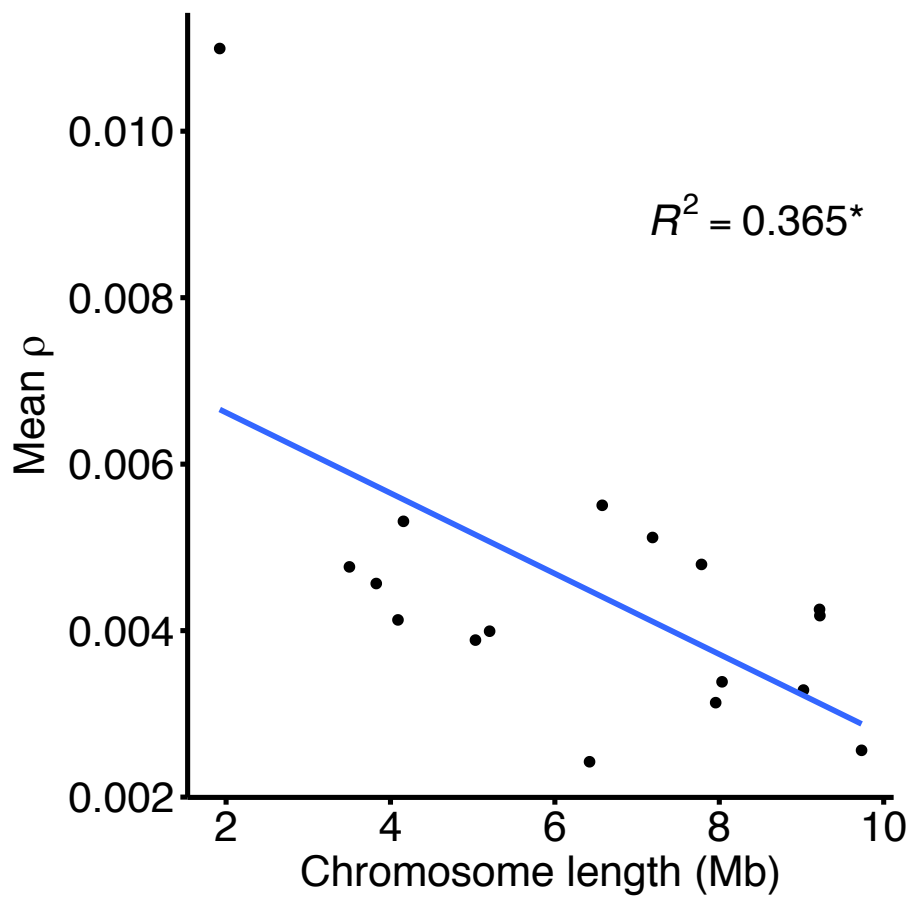

Figure S3: Chromosome length inversely scales with mean recombination rate ( $R^2 = 0.4803$ ). Each point represents one of the 17 *C. reinhardtii* chromosomes.

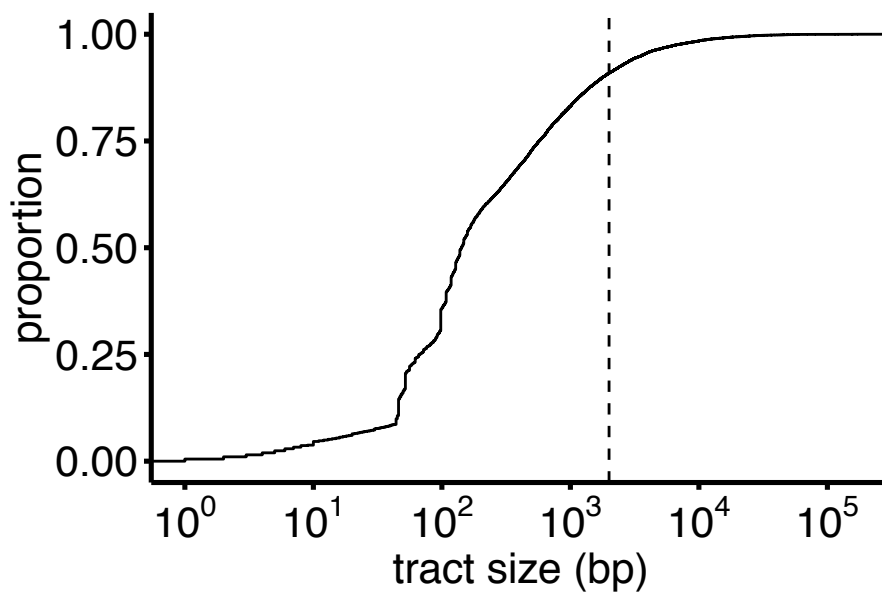

Figure S4: Cumulative frequency distribution of intergenic tract sizes, calculated using the *C. reinhardtii* v5.3 annotation. Dashed line indicates tract size = 2 kbp.
